# Supplementary material
Source: publisher figshare collection journal article supplement (https://karger.figshare.com/ndownloader/files/24100922)
Supplement: Supplementary file 1 [file 24100922]

**Supplemental Table 2. SBP of LCZ696 and ARB**

| **Study** | **LCZ696** | **LCZ696** | | **ARB** | **ARB** | |
| --- | --- | --- | --- | --- | --- | --- |
| **baseline** | **final** | **baseline** | **final** |
| **Ruilope LM [6]**  **(NCT00549770)** | 100 mg  200 mg  400 mg | 154.9±11.9  156.8±12.0  156.3±12.3 | 130.0±10.5  128.1±10.9  126.0±11.1 | Valsartan 80mg  Valsartan 160mg  Valsartan 320mg | 154.8±10.5  155.3±10.8  156.0±11.5 | 134.0±11.0  131.9±11.5  131.8±12.1 |
| **Kario K [7]**  **(NCT01193101)** | 100 mg  200 mg  400 mg | 155.7±10.7  155.7±9.2  153.9±9.4 | 127.1±10.1  128.0±8.5  123.5±10.0 | — | — | — |
| **RATIO [8]**  **(NCT01281306)** | 400 mg | 159.6±7.0 | 126.8±8.1 | Valsartan 320mg | 160.0±7.3 | 133.9±8.8 |
| **Supasyndh O [9]**  **(NCT01615198)** | 100mg  200mg | 160.5±8.4  160.5±8.4 | 126.0±9.0  130.9±9.5 | Olmesartan 10mg  Olmesartan 20mg | 160.0±8.0  160.0±8.0 | 130.9±8.1  140.3±9.0 |
| **PARAMETER [10]**  **(NCT01692301)** | 200 mg | 158.4±13.4 | 127.0±10.1 | Olmesartan 20mg | 158.8±13.5 | 134.3±11.1 |
| **Schmieder RE [14]**  **(NCT01870739)** | 400 mg | 155.3±9.0 | 129.4±11.3 | Olmesartan 20mg | 155.0±9.1 | 134.0±12.8 |
| **Wang TD [16]**  **(NCT01681576)** | 400 mg | 147.0±9.7 | 124.0±10.1 | Valsartan 320mg | 147.5±12.1 | 130.8±11.1 |
| **NCT01599104 [11]** | 200 mg  400 mg | — | — | Olmesartan 20 mg | — | — |
| **NCT01785472 [12]** | 200 mg  400 mg | — | — | Olmesartan 20mg | — | — |
| **NCT01876368 [13]** | 200 mg | — | — | Olmesartan 20mg | — | — |
| **NCT01353508 [15]** | 400 mg | — | — | Valsartan 160mg | — | — |
| **NCT01256411 [17]** | 200 mg  400 mg | — | — | — | — | — |

- **: no report; ARB: angiotensin receptor blockers**
